# Supplementary material for: Facile synthesis of β-MnO2/polypyrrole nanorods and their enhanced lithium-storage properties
Source: Royal Society of Chemistry journal article supplement (doi:10.1039/c5ra26067a), 2016-01-01
Supplement: c5ra26067a1.pdf [file c5ra26067a1.pdf]

## Facile synthesis of $\beta$ -MnO<sub>2</sub>/Polypyrrole nanorods and their enhanced lithium-storage properties

Meng Wang<sup>a</sup>, Qianxu Yang<sup>a</sup>, Tiandong Zhang<sup>a</sup>, Baokun Zhu<sup>a\*</sup> and Guangda Li<sup>b\*</sup>

<sup>a</sup>R&D Center, China Tobacco Yunnan Industrial Co., Ltd., Kunming, 650231, China.

<sup>b</sup>Key Laboratory of Processing and Testing Technology of Glass and Functional Ceramics of Shandong Province, School of Material Science and Engineering, Qilu University of Technology, Jinan, 250353, China. E-mail: ligd@qlu.edu.cn

Table S1 Cycling performance and capacity of MnO<sub>2</sub>-based anode materials reported in previous works.

| Typical materials                                     | Density (mA g <sup>-1</sup> ) | Cycle number | Capacity (mAh g <sup>-1</sup> ) | Ref.     |
|-------------------------------------------------------|-------------------------------|--------------|---------------------------------|----------|
| MnO <sub>2</sub> /hollow carbon sphere                | 1000                          | 500          | 420                             | 1        |
| Fe <sub>3</sub> O <sub>4</sub> /MnO <sub>2</sub>      | 100                           | 150          | 1000                            | 2        |
| MnO <sub>2</sub> /graphene                            | 500                           | 200          | 1079                            | 3        |
| MnO <sub>2</sub> /Carbon                              | 50                            | 100          | 630                             | 4        |
| CoFe <sub>2</sub> O <sub>4</sub> /MnO <sub>2</sub> /C | 100                           | 250          | 713.6                           | 5        |
| MnO <sub>2</sub> /graphene                            | 400                           | 260          | 612                             | 6        |
| MnO <sub>2</sub> /graphene                            | 100                           | 200          | 836                             | 7        |
| MnO <sub>2</sub> /graphene                            | 1000                          | 200          | 1200                            | 8        |
| MnO <sub>2</sub> nanoflakes                           | 5C                            | 100          | 492.9                           | 9        |
| MnO <sub>2</sub> nanorods                             | 100                           | 100          | 1100                            | 10       |
| MnO <sub>2</sub> /N-doped graphene                    | 300                           | 200          | 700                             | 11       |
| MnO <sub>2</sub> nanowires                            | 100                           | 140          | 381                             | 12       |
| MnO <sub>2</sub> particles                            | 50                            | 150          | 754                             | 13       |
| MnO <sub>2</sub> /PPy                                 | 200                           | 80           | 1028                            | Our work |
| MnO <sub>2</sub> /PPy                                 | 1000                          | 100          | 927                             | Our work |

- [1] J. Zang, J. J. Chen, C. L. Zhang, Q. Hang, M. S. Zheng, Q. F. Dong, *J. Mater. Chem. A*, **2014**, 2, 6343.
- [2] Y. Q. Fu, X. Y. Wang, H. Wang, Y. W. Zhang, X. K. Yang, H. B. Shu, *RSC Adv.*, **2015**, 5, 14531.
- [3] Z. P. Li, J. P. Wang, Z. F. Wang, Y. B. Tang, C. S. Lee, S. R. Yang, *RSC Adv.*, **2014**, 4, 54416.
- [4] Y. Wang, Z. J. Han, S. F. Yu, R. R. Song, H. H. Song, K. Ostrikov, H. Y. Yang, *Carbon*, **2013**, 64, 230.
- [5] J. J. Zhou, T. Yang, M. L. Mao, W. J. Ren, Q. H. Li, *J. Mater. Chem. A*, **2015**, 3, 12328.
- [6] L. Li, A. O. Raji, J. M. Tour, *Adv. Mater.*, **2013**, 25, 6298.
- [7] Y. Y. Li, Q. W. Zhang, J. L. Zhu, X. L. Wei, P. K. Shen, *J. Mater. Chem. A*, **2014**, 2, 3163.
- [8] Y. Cao, X. G. Lin, C. L. Zhang, C. Yang, Q. Zhang, W. Q. Hu, M. S. Zheng, Q. F. Dong, *J. Mater. Chem. A*, **2014**, 4, 30150.
- [9] X. W. Li, D. Li, Z. W. Wei, X. N. Shang, D. Y. He, *Electrochim. Acta*, **2014**, 121, 415.
- [10] J. B. Chen, Y. W. Wang, X. M. He, S. M. Xu, M. Fang, X. Zhao, Y. M. Shang, *Electrochim. Acta*, **2014**, 142, 152.
- [11] T. Z. Yang, T. Qian, M. F. Wang, J. Liu, J. Q. Zhou, Z. Z. Sun, M. Chen, C. L. Yan, *J. Mater. Chem. A*, **2015**, 3, 6291.
- [12] D. F. Sun, J. T. Chen, J. Yang, X. B. Yan, *CrystEngComm*, **2014**, 16, 10476.
- [13] Y. S. Yun, J. M. Kim, H. H. Park, J. Lee, Y. S. Huh, H. J. Jin, *J. Power Source*, **2013**, 244, 747.
